# Supplementary material for: Global optimal eBURST analysis of multilocus typing data using a graphic matroid approach
Source: PubMed Central journal article supplement (PMC2705362; doi:10.1186/1471-2105-10-152), 2009-05-18

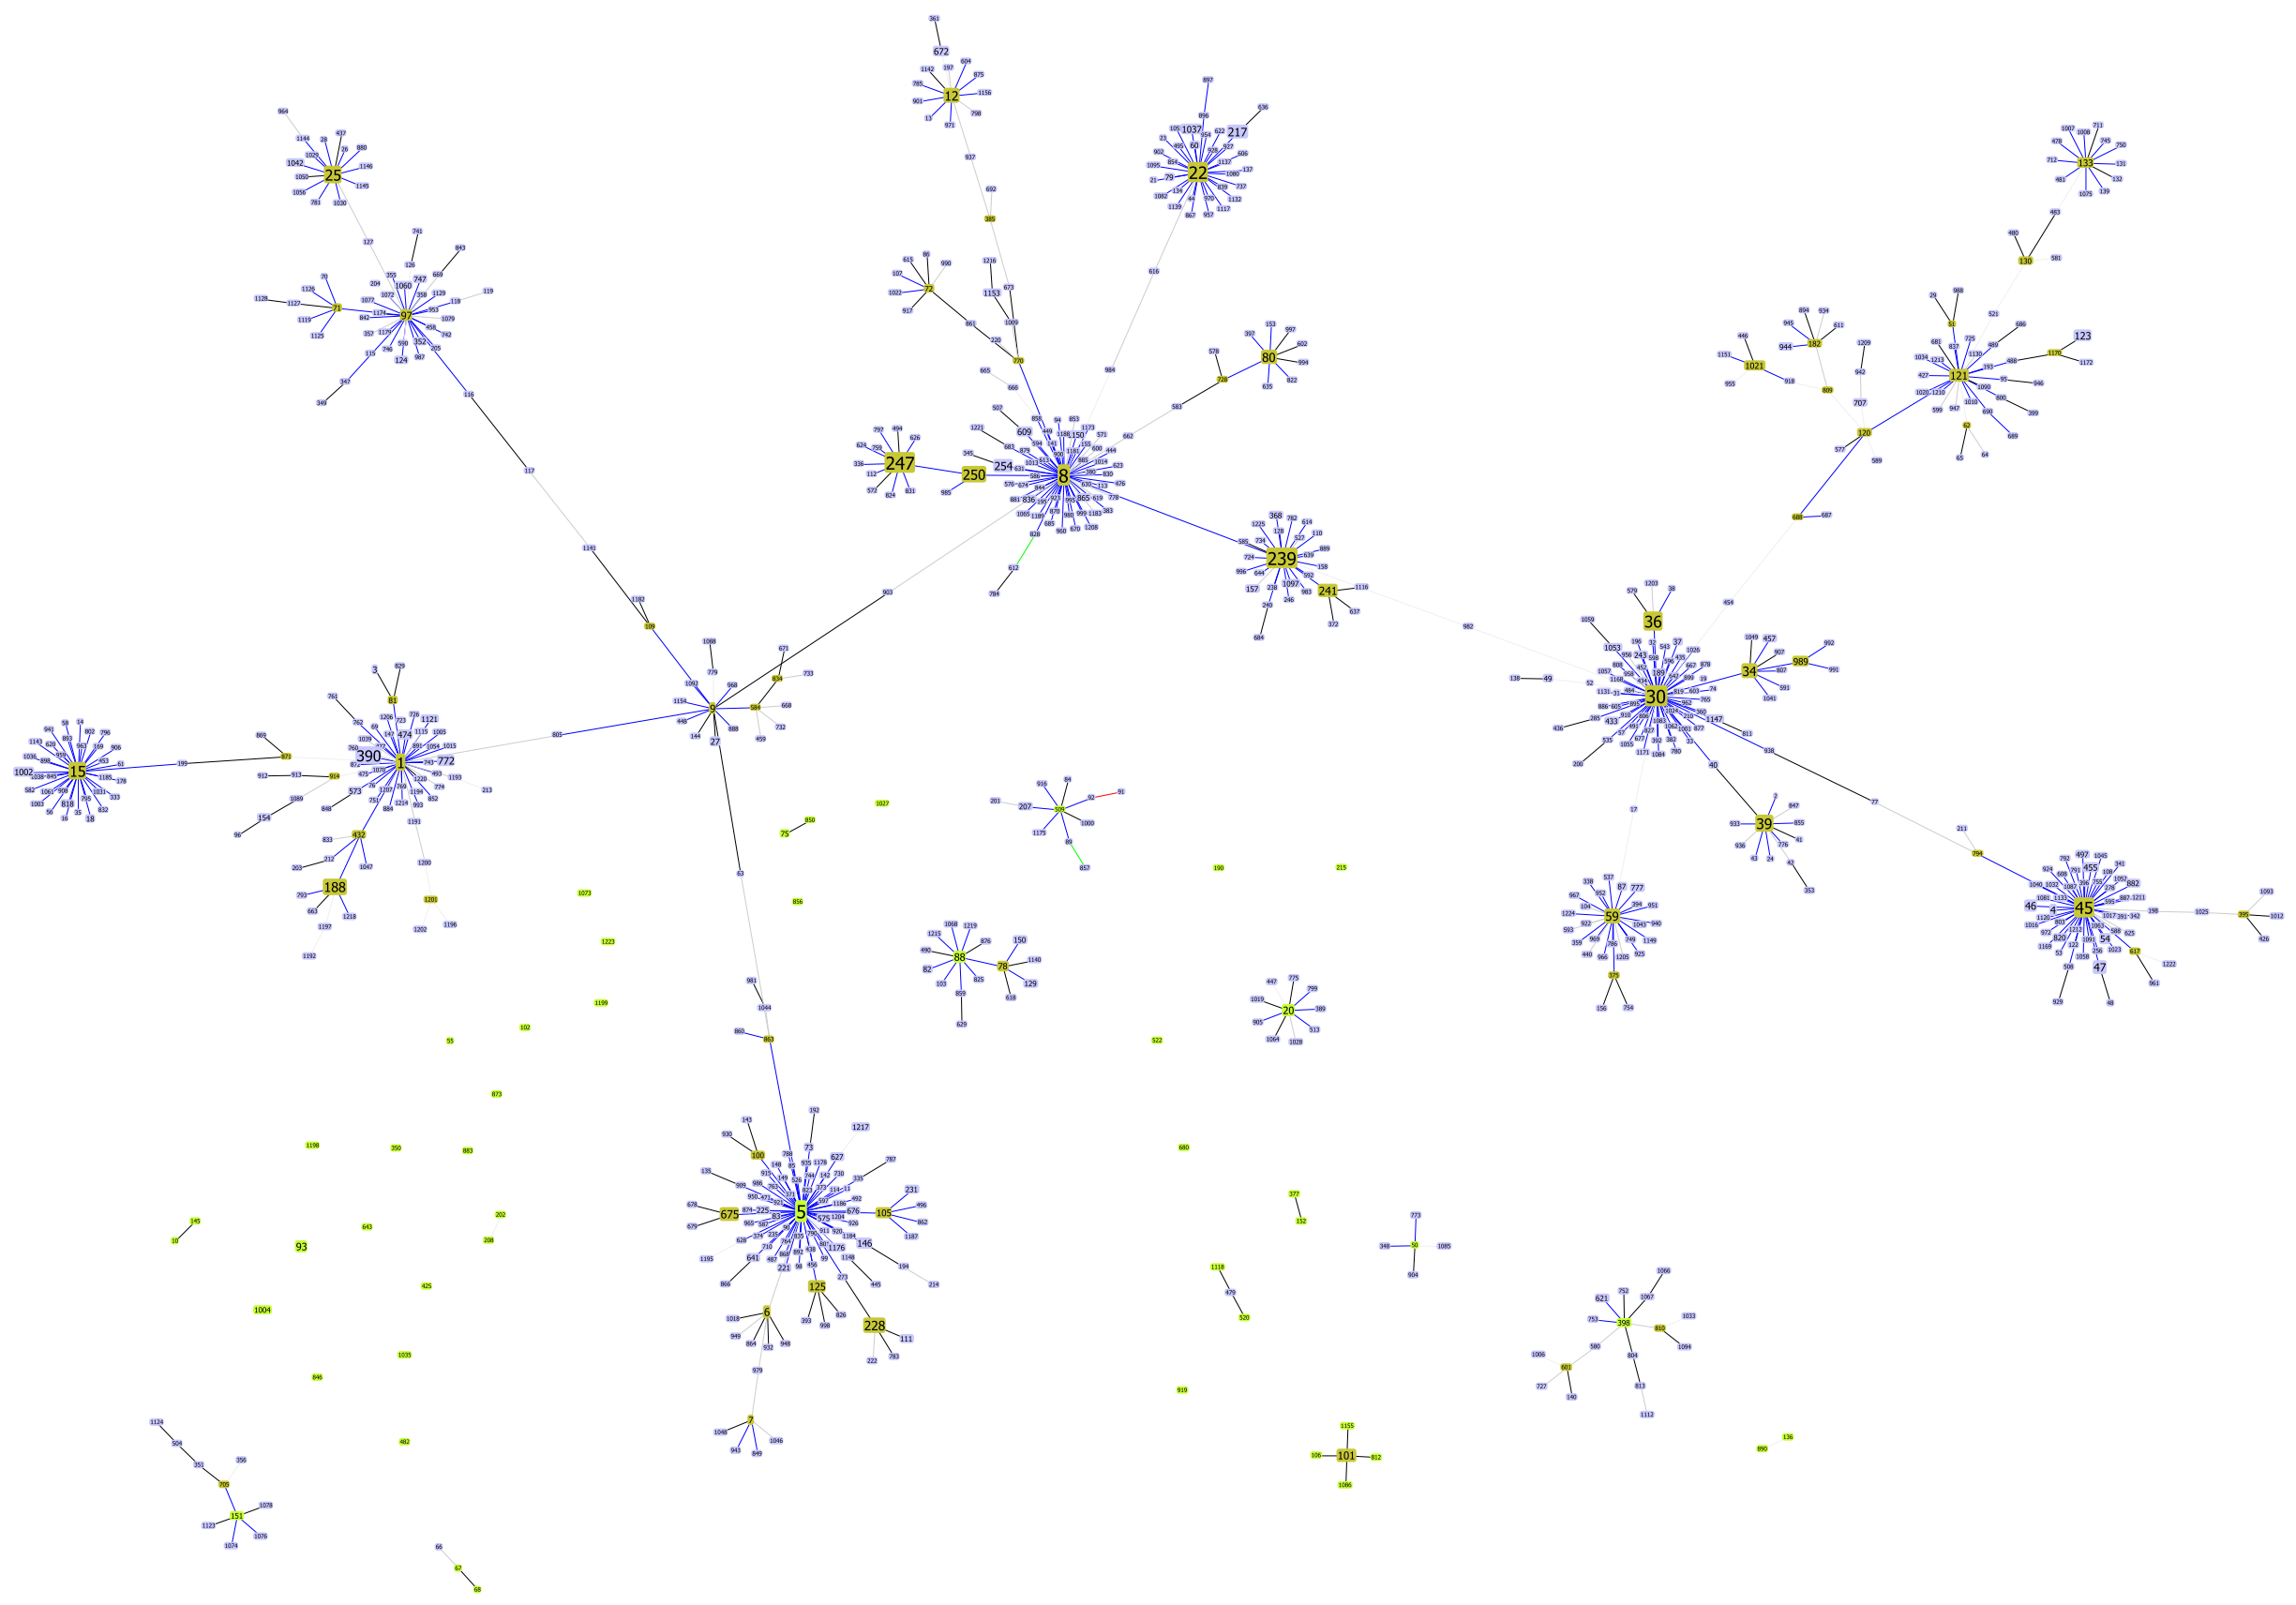

Supplement: 1471-2105-10-152-S1.pdf [file 1471-2105-10-152-S1.pdf]
